# Supplementary material
Source: Springer Nature journal article supplement (https://www.springermedizin.de/resource/supplementary/12865_2010_378_MOESM6_ESM.pdf/9427870)

# Tim-2

**A**

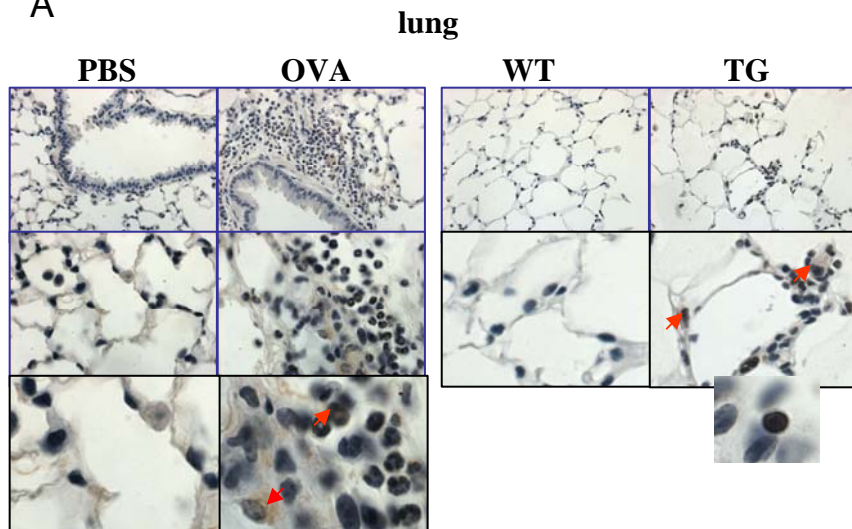

**B**

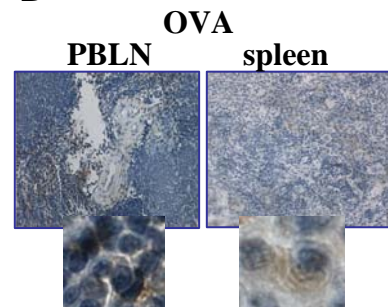

**C**

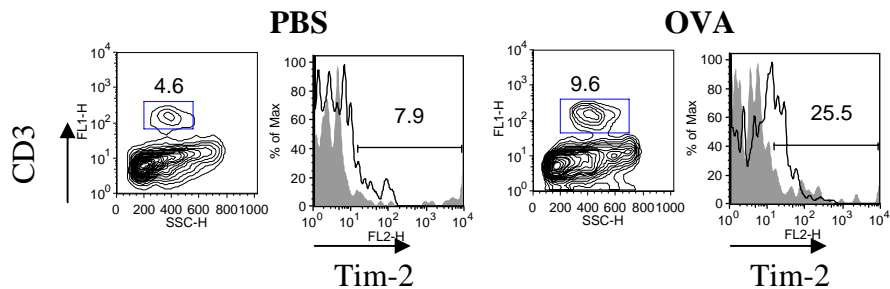

Supplement: MOESM6 [file 9427870]
